# Supplementary material
Source: PubMed Central journal article supplement (PMC7056556)
Supplement: NIHMS1548523-supplement-1.pdf [file NIHMS1548523-supplement-1.pdf]

## Supplementary information

### **HIF-2-induced long non-coding RNA RAB11B-AS1 promotes hypoxia-mediated angiogenesis and breast cancer metastasis**

Yanling Niu,<sup>1</sup> Lei Bao,<sup>1</sup> Yan Chen,<sup>1</sup> Chenliang Wang,<sup>1</sup> Maowu Luo,<sup>1</sup> Bo Zhang,<sup>1</sup> Mi Zhou,<sup>1</sup> Jennifer E. Wang,<sup>1</sup> Yisheng V. Fang,<sup>1</sup> Ashwani Kumar,<sup>2</sup> Chao Xing,<sup>2,3,4</sup> Yingfei Wang,<sup>1,5\*</sup> and Weibo Luo<sup>1,6\*</sup>

<sup>1</sup>Department of Pathology,

<sup>2</sup>Eugene McDermott Center for Human Growth and Development,

<sup>3</sup>Department of Bioinformatics,

<sup>4</sup>Department of Population and Data Sciences,

<sup>5</sup>Department of Neurology and Neurotherapeutics,

<sup>6</sup>Department of Pharmacology,

UT Southwestern Medical Center, Dallas, TX 75390, USA.

```

1 70
CCCCGGCGCGTCCTAGGTCCCCAGGTCTCTCCGGGCTCCGGCTCCGTATAGCCGCGCATCCTAGCCC
-----CGCGTCCTAGGTCCCCAGGTCTCTCCGGGCTCCGGCTCCGTATAGCCGCGCATCCTAGCCC
71 140
GAAGCTGATGCTGCCGGTTCGGCTCCGGCCTTCCGGCTGCCTGACCCGCCGGGCCCAAGCCCCGGGCT
GAAGCTGATGCTGCCGGTTCGGCTCCGGCCTTCCGGCTGCCTGACCCGCCGGGCCCAAGCCCCGGGCT
141 210
CCGGCTGGGCCAGCGGCCTGGAGCGCGGCCTTGGCCCGTCTGCCGCCGCTCGCCGCCACGACTTCG
CCGGCTGGGCCAGCGGCCTGGAGCGCGGCCTTGGCCCGTCTGCCGCCGCTCGCCGCCACGACTTCG
211 280
CCCGTCTGTGCCCCACCGGCCGACCTTTGAATAGGTAGTCTGACTCGTCTCGTCCCGGGTCCCCATTGTCC
CCCGTCTGTGCCCCACCGGCCGACCTTTGAATAGGTAGTCTGACTCGTCTCGTCCCGGGTCCCCATTGTCC
281 350
TGGCGCTTCCGGCGGGATCGGCGACTCCGCAGCCCCACCACAAACACCCGACGGGGGCGGAGCCGGCGCC
TGGCGCTTCCGGCGGGATCGGCGACTCCGCAGCCCCACCACAAACACCCGACGGGGGCGGAGCCGGCGCC
351 420
GCGCAGAGCGGCGGTTGAATGGCCTATCAGCGGCGAGTGGAGTAGCGACGGGCACCCAGCGAAGCCAATC
GCGCAGAGCGGCGGTTGAATGGCCTATCAGCGGCGAGTGGAGTAGCGACGGGCACCCAGCGAAGCCAATC
421 490
AGAGATGGAAGTAGTGCTCTGAGGGTGGGCGCCGCTTGGTACCACCCTCCTCGCCCTCGGTGTCTGGAG
AGAGATGGAAGTAGTGCTCTGAGGGTGGGCGCCGCTTGGTACCACCCTCCTCGCCCTCGGTGTCTGGAG
491 560
AAAGCGGAAGGAATGCGGACCTTTTTGAAGTGACGGACGCGCCAGCCTATCAGGGGCGAGCTCAAGAGG
AAAGCGGAAGGAATGCGGACCTTTTTGAAGTGACGGACGCGCCAGCCTATCAGGGGCGAGCTCAAGAGG
561 630
GCGGGGCGGAAGACTGCAGGAATGAAATGGATTGACAGACCAAATAACTAATGAGAGGCTTGATTGAGAA
GCGGGGCGGAAGACTGCAGGAATGAAATGGATTGACAGACCAAATAACTAATGAGAGGCTTGATTGAGAA
631 700
CCTACCCGACTATCAGAGGACCTGTCCGGGAAGAGAAATGGGGCTACGTCCAGACAGAATCTCGCTCTGT
CCTACCCGACTATCAGAGGACCTGTCCGGGAAGAGAAATGGGGCTACGTCCAGACAGAATCTCGCTCTGT
701 770
TGCTGGGCTGGAGTGCAGTGGCACTGTATCCGGAATTGGGGGTTCTTGGTCTCACTGACTTCAAGAAT
TGCTGGGCTGGAGTGCAGTGGCACTGTATCCGGAATTGGGGGTTCTTGGTCTCACTGACTTCAAGAAT
771 840
GAAGCCATGGACCCTTGCAGATGGGGTTCCACCATGTTGGCCGGCTGGTCTCGAAGTCTGACCTCA
GAAGCCATGGACCCTTGCAGATGGGGTTCCACCATGTTGGCCTGGTCTCGAAGTCTGACCTCA
841 910
AGTGACCTGCCTGTCTCGGCCTCACAAATGGCTGGGATTACAGGCACGAGACACCGTGCCTGGCCCTGGG
AGTGACCTGCCTGTCTCGGCCTCACAAATGGCTGGGATTACAGGCACGAGACACCGTGCCTGGCCCTGGG
911 980
AACATGTTTACATGGACTTTGTTCACTTTTTTAAAACAACTGAGGGTAACTTACTAGATCTGTGAACTAA
AACATGTTTACATGGACTTTGTTCACTTTTTTAAAACAACTGAGGGTAACTTACTAGATCTGTGAACTAA
981 1044
AGAAAGAGAAAAAAAAAGAAAGAAAACAAACAAGAACAAGAAAAAAAAAAAAAAAA-----
AGAAAGAGAAAAAAAAAGAAAGAAAACAAACAAGAACAAGAAAAAAAAAAAAAAAAAAAAAAAA

```

**Supplementary Fig. S1.** The nucleotide sequence of RAB11B-AS1 identified by 5'- and 3'-RACE in human MDA-MB-231 cells. The RAB11B-AS1 sequence from 5'- and 3'-RACE is shown in orange and the mutated nucleotides are marked in blue as compared with the reference sequence in the GenBank (NR\_038237.1), which is shown in black. The nucleotide sequence of RAB11B-AS1 has been deposited in the GenBank with the accession number MK855053.

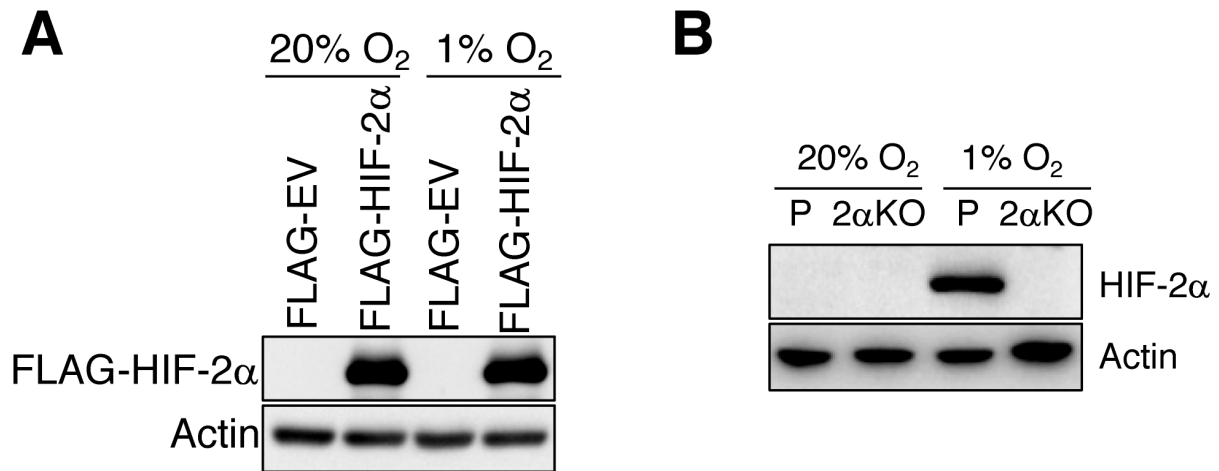

**Supplementary Fig. S2.** Validation of HIF-2 $\alpha$  protein levels in overexpressed and knockout cells. **A**, Immunoblot analysis of FLAG-HIF-2 $\alpha$  and actin in HEK293T cells exposed to 20% or 1% O<sub>2</sub> for 24 hours. Representative blots from three experiments are shown. **B**, Immunoblot analysis of HIF-2 $\alpha$  and actin in parental and HIF-2 $\alpha$  KO HeLa cells exposed to 20% or 1% O<sub>2</sub> for 24 hours. Representative blots from three experiments are shown.

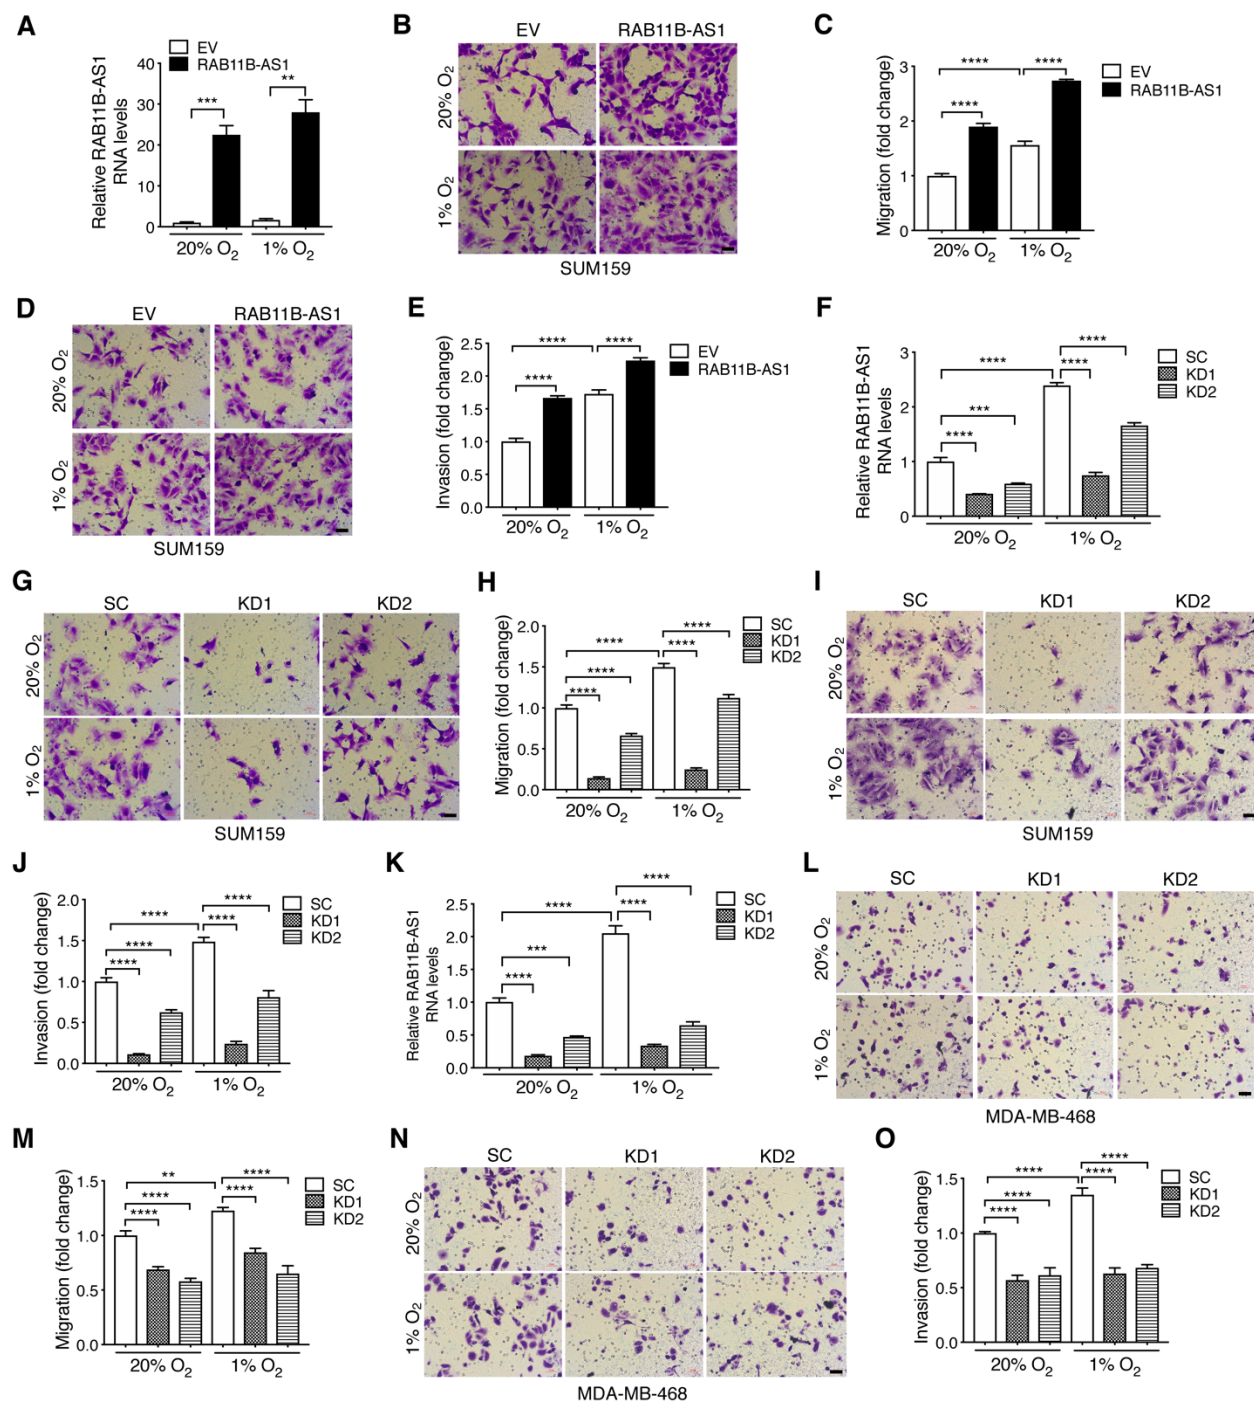

**Supplementary Fig. S3.** RAB11B-AS1 increases breast cancer cell migration and invasion in vitro. **A**, RT-qPCR analysis of RAB11B-AS1 RNA levels in SUM159 cells stably transfected with RAB11B-AS1 expression vector or EV and exposed to 20% or 1% O<sub>2</sub> for 24 hours. RAB11B-AS1 RNA/18S rRNA was normalized to EV at 20% O<sub>2</sub> (mean ± SEM, n = 3). \*\* p < 0.01; \*\*\* p < 0.001. **B** and **C**, Transwell migration of SUM159-EV and -RAB11B-AS1 cells exposed to 20% or 1% O<sub>2</sub> for 16 hours. Representative images from three independent experiments are shown in **B**. Scale bar, 50 μm. The number of migrated cells were counted and normalized to EV at 20% O<sub>2</sub> (**C**, mean

± SEM, n = 3). \*\*\*\*p < 0.0001. **D** and **E**, Transwell invasion of SUM159-EV and -RAB11B-AS1 cells exposed to 20% or 1% O<sub>2</sub> for 24 hours. Representative images from three independent experiments are shown in **D**. Scale bar, 50 μm. The number of invaded cells were counted and normalized to EV at 20% O<sub>2</sub> (**E**, mean ± SEM, n = 3). \*\*\*\*p < 0.0001. **F**, RT-qPCR analysis of RAB11B-AS1 RNA levels in SC and RAB11B-AS1 KD SUM159 cells exposed to 20% or 1% O<sub>2</sub> for 24 hours. RAB11B-AS1 RNA/18S rRNA was normalized to SC at 20% O<sub>2</sub> (mean ± SEM, n = 3). \*\*\*p < 0.001; \*\*\*\*p < 0.0001. **G** and **H**, Transwell migration of SC and RAB11B-AS1 KD SUM159 cells exposed to 20% or 1% O<sub>2</sub> for 16 hours. Representative images from three independent experiments are shown in **G**. Scale bar, 50 μm. The number of migrated cells were counted and normalized to SC at 20% O<sub>2</sub> (**H**, mean ± SEM, n = 3). \*\*\*\*p < 0.0001. **I** and **J**, Transwell invasion of SC and RAB11B-AS1 KD SUM159 cells exposed to 20% or 1% O<sub>2</sub> for 24 hours. Representative images from three independent experiments are shown in **I**. Scale bar, 50 μm. The number of invaded cells were counted and normalized to SC at 20% O<sub>2</sub> (**J**, mean ± SEM, n = 3). \*\*\*\*p < 0.0001. **K**, RT-qPCR analysis of RAB11B-AS1 RNA levels in SC and RAB11B-AS1 KD MDA-MB-468 cells exposed to 20% or 1% O<sub>2</sub> for 24 hours. RAB11B-AS1 RNA/18S rRNA was normalized to SC at 20% O<sub>2</sub> (mean ± SEM, n = 3). \*\*\*p < 0.001; \*\*\*\*p < 0.0001. **L** and **M**, Transwell migration of SC and RAB11B-AS1 KD MDA-MB-468 cells exposed to 20% or 1% O<sub>2</sub> for 16 hours. Representative images from three independent experiments are shown in **L**. Scale bar, 50 μm. The number of migrated cells were counted and normalized to SC at 20% O<sub>2</sub> (**M**, mean ± SEM, n = 3). \*\*p < 0.01; \*\*\*\*p < 0.0001. **N** and **O**, Transwell invasion of SC and RAB11B-AS1 KD MDA-MB-468 cells exposed to 20% or 1% O<sub>2</sub> for 24 hours. Representative images from three independent experiments are shown in **N**. Scale bar, 50 μm. The number of invaded cells were counted and normalized to SC at 20% O<sub>2</sub> (**O**, mean ± SEM, n = 3). \*\*\*\*p < 0.0001.

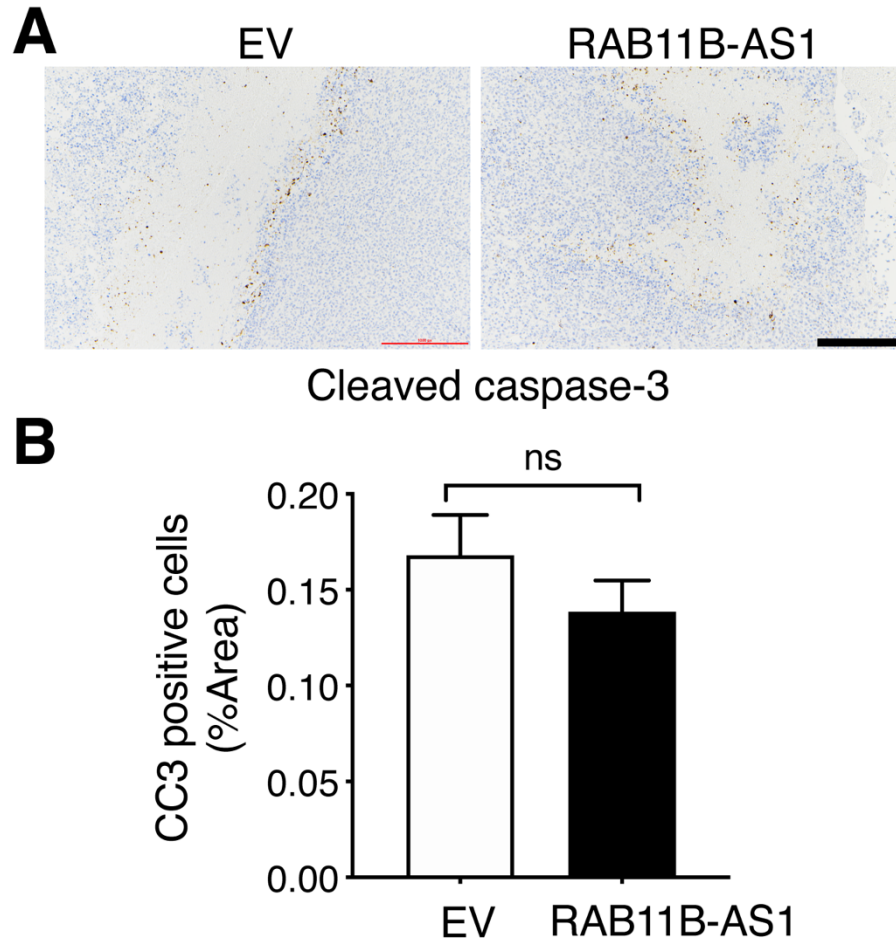

**Supplementary Fig. S4.** RAB11B-AS1 has no effect on caspase-3-dependent cell death in tumors. **A**, Representative immunohistochemical staining of cleaved caspase-3 (CC3) in MDA-MB-231-EV or -RAB11B-AS1-overexpressed tumors. Scale bar, 1 mm. **B**, The CC3-positive area was quantified and normalized to the total area (mean  $\pm$  SEM, n = 5). ns, not significant.

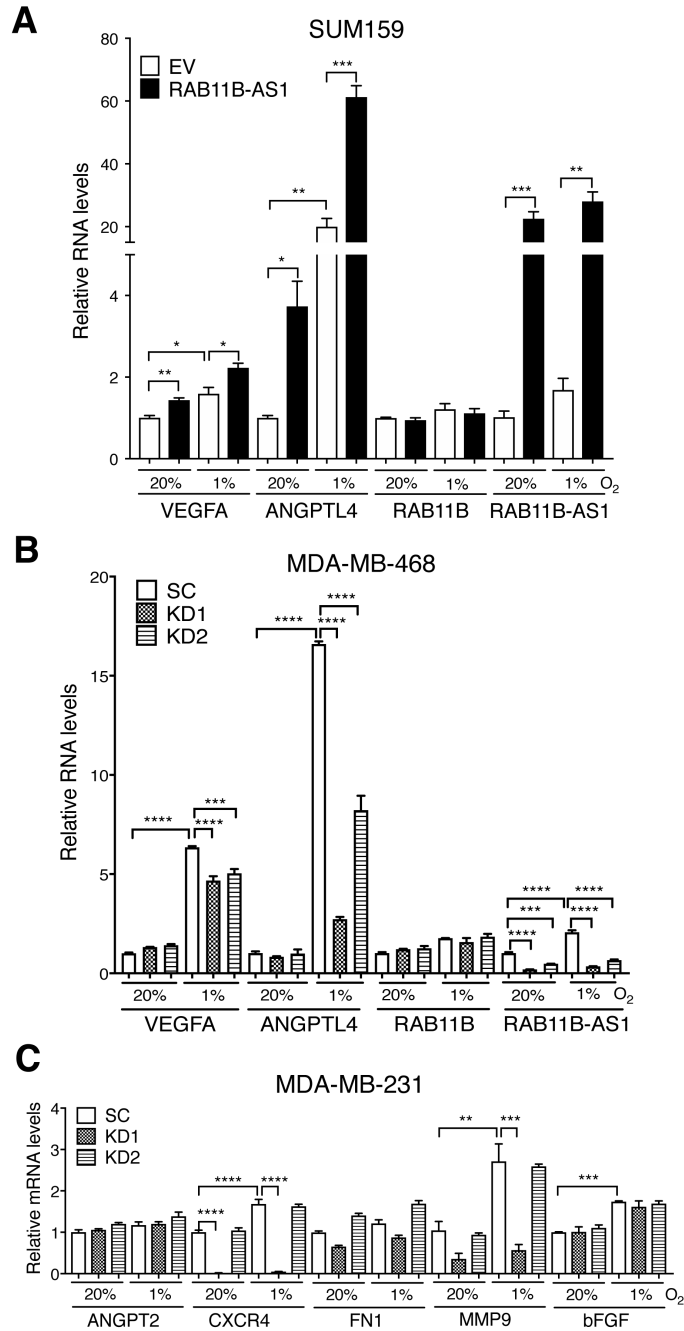

**Supplementary Fig. S5.** RAB11B-AS1 increases hypoxia-induced expression of angiogenic factors in breast cancer cells. **A**, RT-qPCR analysis of VEGFA mRNA, ANGPTL4 mRNA, RAB11B mRNA, and RAB11B-AS1 RNA in SUM159-EV and -RAB11B-AS1 cells exposed to 20% or 1% O<sub>2</sub> for 24 hours (mean  $\pm$  SEM, n = 3). \*p < 0.05; \*\*p < 0.01; \*\*\*p < 0.001. **B**, RT-qPCR analysis of VEGFA mRNA, ANGPTL4 mRNA, RAB11B mRNA, and RAB11B-AS1 RNA in SC and RAB11B-AS1 KD MDA-MB-468 cells exposed to 20% or 1% O<sub>2</sub> for 24 hours (mean  $\pm$  SEM, n = 3). \*\*\*p < 0.001; \*\*\*\*p < 0.0001. **C**, RT-qPCR analysis of ANGPT2, CXCR4, FN1, MMP9, and bFGF mRNAs in SC and RAB11B-AS1 KD MDA-MB-231 cells exposed to 20% or 1% O<sub>2</sub> for 24 hours (mean  $\pm$  SEM, n = 3). \*\*p < 0.01; \*\*\*p < 0.001; \*\*\*\*p < 0.0001.

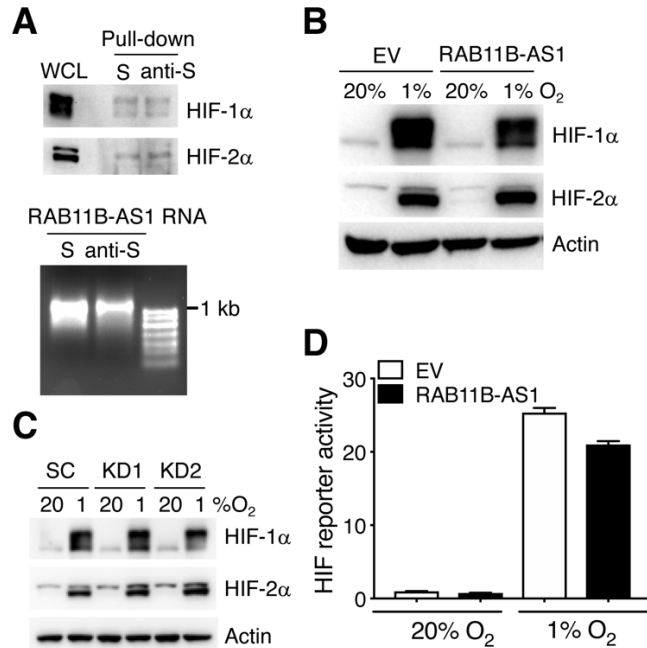

**Supplementary Fig. S6.** RAB11B-AS1 fails to regulate HIF transcriptional activity. **A**, Sense and antisense of biotin-labeled RAB11B-AS1 RNA were transcribed *in vitro* and incubated in the presence of streptavidin magnetic beads for 2 hours at 4°C with lysates from MDA-MB-231 cells exposed to 1% O<sub>2</sub> for 24 hours, followed by immunoblot analysis with anti-HIF-1α or anti-HIF-2α antibody. **B** and **C**, Immunoblot analysis of HIF-1α and HIF-2α in RAB11B-AS1 overexpressed (**B**) or knockdown (**C**) MDA-MB-231 cells exposed to 20% or 1% O<sub>2</sub> for 6 hours. β-actin was used as an internal control. Representative blots from three experiments are shown. **D**, HEK293T cells were co-transfected with a HIF luciferase reporter plasmid, pSV40-Renilla, and EV or RAB11B-AS1 expression vector, and exposed to 20% or 1% O<sub>2</sub> for 24 hours. Firefly/*Renilla* luciferase activities were normalized to EV at 20% O<sub>2</sub> (mean ± SEM, n = 3).
